# Supplementary material for: Performance And Agreement Of Risk Stratification Instruments For Postoperative Delirium In Persons Aged 50 Years Or Older
Source: PLoS One. 2014 Dec 2;9(12):e113946. doi: 10.1371/journal.pone.0113946 (PMC4252072; doi:10.1371/journal.pone.0113946)
Supplement: Table S1 — (DOC) [file pone.0113946.s001.doc]

**Table S1.** Definition of risk factors included by the risk stratification instruments for postoperative delirium.

| Risk stratification instrument (first author, year of publication) | Risk factor | Definition in original study | Definition in this study |
| --- | --- | --- | --- |
| Inouye, 1993 | Cognitive impairment | MMSE <24 points | Patient or a family member answered “yes” to the question “Do you have memory problems?”a |
| Vision impairment | Corrected vision <20/70 on binocular test | Patient or a family member answered “yes” to the question “Do you experience problems in daily life due to poor vision?”b |
| Illness severity | APACHE II >16 points | As in original study |
| Dehydration | BUN-to-creatinine ratio (in mg/dL) ≥18 at admission | As in original study |
| Marcantonio, 1994 | Cognitive impairment | TICS <30 points | Patient or a family member answered “yes” to the question “Do you have memory problems?”a |
| Age | <70 vs. ≥70 year | As in original study |
| Alcohol abuse | Having a problem with drinking too much alcohol | Alcohol abuse or addiction as reported by the patient or a family member. |
| Physical functioning | Unable to walk 4 km/h for one block, or dress themselves without stopping (SAS-IV) | Physical fitness ≤ 6/10 points as rated by the patient when asked the question “What mark do you give yourself for physical fitness?”c |
| Abnormal levels of preoperative sodium, potassium or glucose | Sodium <130 or >150 mmol/L; potassium <3.0 or >6.0 mmol/l; glucose <3.3 or >16.7 mmol/L | Sodium <130 or >150 mmol/l; potassium <3.0 or >6.0 mmol/l |
| Type of surgery | Surgery for aortic aneurysm or noncardiac thoracic surgery or other noncardiac surgery | As in original study |
| Pompei, 1994 | Cognitive impairment | For education <high school, MMSE <21 points; for high school education, MMSE <23 points; for college education, MMSE <24 points | Patient or a family member answered “yes” to the question “Do you have memory problems?”a |
| Alcohol abuse | SMAST >1 points, or CAGE >1 point | Alcohol abuse or addiction as reported by the patient or a family member. |
| Depression | Development cohort, GDS-15 >4 points; validation cohort, GDS >6points. | Patient or a family member answered “yes” or “sometimes” to the question “Did you feel downhearted or sad recently?”d |
| Comorbidity | Major Diagnostic Categories (MDC) >3 points | ≥2 diseases as documented in the patient’s medical record. |
| O’Keeffe, 1996 | Cognitive impairment | Cognitive status interfering with social functioning, or BDRS ≥4 points | If patient or a family member answered “yes” to the question “Do you have memory problems?”a |
| Illness severity | Subjective rating by a physician | As in original study |
| Abnormal level of urea | Blood urea >10 mmol/L | As in original study |
| Freter, 2005 | Cognitive impairment | MMSE <24 points, or previous postoperative delirium | Patient or a family member answered “yes” to the question “Do you have memory problems?”a, or patient or a family member answered “yes” to the question “Did you feel confused during previous illness or hospitalization?”e |
| Age | <80 vs. ≥80 year | As in original study |
| Substance abuse | Alcohol or benzodiazepines more than 3 times a week | Alcohol abuse or addiction or use of benzodiazepines as reported by the patient or a family member. |
| Vision or hearing impairment | Using hearing aid of having very poor vision | Patient or a family member answered “yes” to the question “Do you experience problems in daily life due to poor vision?”b, or “Do you experience problems in daily life due to poor hearing?”f |
| Dependency in activities of daily life | Needing assistance in bathing, dressing, toileting, grooming or feeding | Patient or a family member answered “no” to the question “Are you able to walk around outside without help?”g, or “Are you able to dress and undress without help?”h, or “Are you able to go to the toilet without help?”i |
| Greene, 2009 | Impairment in executive function | TMT-B >154 seconds, or MSIT ≥60 seconds | Letterfluency (initial letter S) ≤5 words/min |
| Depression | GDS-15 >4 points, or BDI ≥14 points | Patient or a family member answered “yes” or “sometimes” to the question “Did you feel downhearted or sad recently?”d |
| Rudolph, 2009 | Cognitive impairment | MMSE ≤23 points and MMSE 24-27 points as compared to MMSE 28-30 points | Patient or family member answered “yes” to the question “Do you have memory problems?”a |
| History of stroke or TIA | History of stroke or transient ischemic attack | History of cerebrovascular disease as documented in the patient’s medical record. |
| Depression | GDS-15 >4 points | Patient or a family member answered “yes” or “sometimes” to the question “Did you feel downhearted or sad recently?”d |
| Abnormal preoperative level of albumin | Serum albumin <3.6 or >4.4 g/dL | As in original study |
| Martinez, 2012 | Age | <86 vs. ≥ 86 year | As in original study |
| Use of psychotropic drugs | Use of benzodiazepines, antidepressants, antidementia drugs or antipsychotics | As in original study |
| Dependency in activities of daily life | Dependency in five or more (out of six) activities of daily living: personal hygiene, (un)dressing, toileting, ambulation, bowel and bladder control, feeding. | Patient or a family member answered “no” to at least two of the questions “Are you able to walk around outside without help?”g, or “Are you able to dress and undress without help?”h, or “Are you able to go to the toilet without help?”i |
| Kobayashi, 2013 | History of confusion | Delirium history | Patient or a family member answered “yes” to the question “Did you have memory problems or feel confused during previous illness or hospitalization?”e |
| Impairment in ADL | Not completely independent according to FIM | Patient or a family member answered “no” to at least one of the questions “Are you able to shop”j, “Are you able to walk around outside without help?”g, “Are you able to dress and undress without help?”h, or “Are you able to go to the toilet without help?”i, or answered “yes” to the question “Do you have memory problems?”a |
| Age | ≤75 vs. >75 year | As in original study |
| Malignancy | Any kind of malignancy (treated malignancy not included) | As in original study |

Abbreviations: APACHE II, Acute Physiology and Chronic Health Evaluation II [1]; BDI, Beck Depression Inventory [2]; BDRS, Blessed Dementia Rating Scale [3]; BUN, blood urea nitrogen; CAGE, Cutting down, Annoyance by criticism, Guilty feeling, and Eye-openers [4]; FIM, Functional Independence Measure [5]; GDS-15, Geriatric Depression Scale, 15 items version [6]; MDC, Major Diagnostic Categories [7];MMSE, Mini-Mental State Examination [8]; MSIT, Modified Stroop Interference Task [9]; SAS, Specific Activity Scale [10]; SMAST, Short Michigan Alcoholism Screening Test [11]; TICS, Telephone Interview for Cognitive status [12]; TMT-B, Trail Making Test, part B [13].

1. From the Dutch Hospital Safety Management Program, theme Vulnerable Elderly [14]: screening questionnaire for risk factors for delirium, question 1.
2. From the Groningen Frailty Indicator [15]: item 6.
3. From the Groningen Frailty Indicator [15]: item 5.
4. From the Groningen Frailty Indicator [15]: item 14.
5. From the Dutch Hospital Safety Management Program, theme Vulnerable Elderly [13]: screening questionnaire for risk factors for delirium, question 3.
6. From the Groningen Frailty Indicator [15]: item 7.
7. From the Groningen Frailty Indicator [15]: item 2.
8. From the Groningen Frailty Indicator [15]: item 3.
9. From the Groningen Frailty Indicator [15]: item 4.
10. From the Groningen Frailty Indicator [15]: item 1.

**References**

1. Knaus WA, Draper EA, Wagner DP, Zimmerman JE. APACHE II: a severity of disease classification system. Crit Care Med. 1985;13:818-829.
2. Beck AT, Ward CH, Mendelsohn M, Mock J, Erbaugh J. An inventory for measuring depression. Arch Gen Psychiatry. 1961;4:561–571.
3. Blessed G, Tomlinson BE, Roth M. The association between quantitative measures of dementia and of senile change in the cerebral grey matter of elderly subjects. Br J Psychiatry. 1968;114:797-811.
4. Ewing JA. Detecting alcoholism. The CAGE questionnaire. JAMA. 1984;252:1905-1907.
5. Granger CV, Hamilton BB, Linacre JM, Heinemann AW, Wright BD. Performance profiles of the functional independence measure Am J Phys Med Rehabil. 1993;72:84-89.
6. Sheikh JI, Yesavage JA. Geriatric Depression Scale (GDS): recent evidence and development of a shorter version. In: Brink TL (Ed.). Clinical gerontology: a guide to assessment and intervention. New York: Haworth Press, 1986, pp. 165-173.
7. Fetter RB, Shin Y, Freeman JL, Averill RF, Thompson JD. Case mix definition by diagnosis-related groups.Med Care. 1980;18 (2 Suppl):iii, 1-53.
8. Folstein MF, Folstein SE, McHugh PR. "Mini-mental state". A practical method for grading the cognitive state of patients for the clinician. J Psychiatr Res. 1975;12:189-198.
9. Bohnen N, Twijnstra A, Jolles J. Performance in the Stroop color word test in relationship to the persistence of symptoms following mild head injury. Acta Neurol Scand. 1992;85:116–121.
10. Goldman L, Hashimoto B, Cook EF, Loscalzo A. Comparative reproducibility and validity of systems for assessing cardiovascular functional class: advantages of a new specific activity scale. Circulation. 1981;64:1227-1234.
11. Selzer ML, Vinokur A, van Rooijan L. A self-administered Short Michigan Alcoholism Screening Test (SMAST). J Stud Alcohol. 1975;36:117-126.
12. Brandt J, Spencer M, Folstein M. The Telephone Interview for Cognitive Status. Neuropsychiatry Neuropsychol Behav Neurol. 1988;1:111-117.
13. Reitan RM. The relation of the trail making test to organic brain damage. J Consult Psychol. 1955; 19:393-394.
14. Dutch Hospital Safety Management Program. 2013. http://www.vmszorg.nl/_page/vms_inline?nodeid=4635&subjectid=10977 (accessed 17 February 2014).
15. Schuurmans H, Steverink N, Lindenberg S, Frieswijk N, Slaets JP. Old or frail: what tells us more? J Gerontol A Biol Sci Med Sci. 2004;59:M962-5.
